# Supplementary material for: Isolation of Extracellular Outer Membrane Vesicles (OMVs) from Escherichia coli Using EVscore47 Beads
Source: MDPI journal article supplement (doi:10.3390/molecules29081831), 2024-04-17
Supplement: s1 [file s1]

**Table S1.** Main parameters of dextran standards and deoxyribonucleic acid (DNA) standard.

| <b>Name</b>     | <b>Mp</b> | <b>Mw</b> | <b>Mn</b> | <b>PDI</b> | <b>R<sub>m</sub>/nm</b> |
|-----------------|-----------|-----------|-----------|------------|-------------------------|
| dextran         | 1080      | 1270      | 1010      | 1.26       | 0.88                    |
| dextran         | 4440      | 5220      | 3260      | 1.60       | 1.78                    |
| dextran         | 9890      | 11600     | 8110      | 1.43       | 2.65                    |
| dextran         | 21400     | 23800     | 18300     | 1.30       | 3.89                    |
| dextran         | 43500     | 48600     | 35600     | 1.36       | 5.53                    |
| dextran         | 66700     | 80900     | 55500     | 1.46       | 6.85                    |
| dextran         | 123600    | 147600    | 100300    | 1.47       | 9.31                    |
| dextran         | 196300    | 273000    | 164200    | 1.66       | 11.72                   |
| dextran         | 276500    | 409800    | 236300    | 1.73       | 13.90                   |
| dextran         | 401300    | 667800    | 332800    | 2.01       | 16.73                   |
| dextran         | 2000000   |           |           |            | 37.23                   |
| calf thymus DNA |           | 8600000   |           |            |                         |

Note: Mp, peak molecular mass; Mw, weight-average molecular weight; Mn, number-average molecular weight; PDI, the polydispersity; R<sub>m</sub>, dextran viscosity radius.
